# Supplementary material
Source: MDPI journal article supplement (https://www.mdpi.com/2075-163X/12/10/1198)
Supplement: s1 [file s1]

## Article

# Lithostratigraphy, Origin, and Geodynamic Setting of Iron Formations and Host Rocks of the Anyouzok Region, Congo Craton, Southwestern Cameroon

Table S1. Anyouzok iron ore deposit drillhole details.

| Hole ID | Easting | Northing | Elevation | End of Hole | Azimuth | Dip angle |
|---------|---------|----------|-----------|-------------|---------|-----------|
| TH9     | 657,797 | 323,609  | 545       | 83          | 180     | −50       |
| TH31    | 657,607 | 324,482  | 350       | 81          | 135     | −50       |
| TD35    | 657,828 | 323,809  | 575       | 281         | 180     | −55       |
| TD37    | 657,809 | 323,698  | 556       | 179         | 180     | −55       |
| TD46    | 658,098 | 323,893  | 573       | 306         | 180     | −55       |
| TD47    | 658,400 | 324,101  | 602       | 329         | 180     | −55       |
| TD60    | 657,794 | 324,605  | 385       | 110         | 140     | −70       |
| TE4     | 660,816 | 317,370  | 686       | 245         | 60      | −50       |
| TE5     | 660,775 | 317,343  | 687       | 182         | 60      | −50       |
| TE6     | 660,705 | 317,321  | 686       | 300         | 60      | −50       |
| TE9     | 660,651 | 317,460  | 680       | 220         | 55      | −50       |
| TE22    | 660,886 | 317,253  | 679       | 139         | 70      | −50       |
| TD65    | 657,564 | 323,327  | 467       | 111         | 140     | −70       |

Table S2. Anyouzok iron ore deposit logging details.

| Northern prospect |        |        |              |                    |             |
|-------------------|--------|--------|--------------|--------------------|-------------|
| Drillhole         | From   | To (m) | Interval (m) | Rock type          | Contact     |
| TH9               | 0      | 3      | 3            | Lateritic cover    | Gradational |
| TH9               | 3      | 16.4   | 13.4         | Hematite cap       | Gradational |
| TH9               | 16.4   | 83     | 66.6         | SBIF               | EOH         |
| TD37              | 0      | 3.3    | 3.3          | Lateritic cover    | Gradational |
| TD37              | 3.3    | 15     | 11.7         | Hematite cap       | Gradational |
| TD37              | 15     | 97.83  | 82.83        | SBIF               | Sharp       |
| TD37              | 97.83  | 106.9  | 9.07         | Biotite gneiss     | Sharp       |
| TD37              | 106.9  | 143.41 | 36.51        | SBIF               | Sharp       |
| TD37              | 143.41 | 179    | 35.59        | Mafic granulite    | EOH         |
| TD35              | 0      | 4      | 4            | Lateritic cover    | Gradational |
| TD35              | 4      | 23.4   | 19.4         | Hematite cap       | Gradational |
| TD35              | 23.4   | 107.08 | 83.68        | SBIF               | Sharp       |
| TD35              | 107.08 | 114.2  | 7.12         | Garnet amphibolite | Sharp       |
| TD35              | 114.2  | 120.74 | 6.54         | SBIF               | Sharp       |
| TD35              | 120.74 | 133.4  | 12.66        | Mafic granulite    | Sharp       |
| TD35              | 133.4  | 220.2  | 86.8         | Biotite gneiss     | Sharp       |
| TD35              | 220.2  | 281    | 60.8         | Mafic granulite    | EOH         |
| TD46              | 0      | 5.44   | 5.44         | Lateritic cover    | Gradational |
| TD46              | 5.44   | 21.44  | 16           | Hematite cap       | Gradational |
| TD46              | 21.44  | 84.9   | 63.46        | Biotite gneiss     | Sharp       |
| TD46              | 84.9   | 96.4   | 11.5         | Mafic granulite    | Sharp       |
| TD46              | 96.4   | 102.4  | 6            | SBIF               | Sharp       |
| TD46              | 102.4  | 110    | 7.6          | Mafic granulite    | Sharp       |
| TD46              | 110    | 118    | 8            | SBIF               | Sharp       |
| TD46              | 118    | 126.9  | 8.9          | Mafic granulite    | Sharp       |
| TD46              | 126.9  | 154.3  | 27.4         | SBIF               | Sharp       |
| TD46              | 154.3  | 186    | 31.7         | Mafic granulite    | Sharp       |

|                          |        |        |       |                    |             |
|--------------------------|--------|--------|-------|--------------------|-------------|
| TD46                     | 186    | 216    | 30    | SBIF               | Gradational |
| TD46                     | 216    | 240    | 24    | Garnet amphibolite | Sharp       |
| TD46                     | 240    | 306    | 66    | Mafic granulite    | EOH         |
| TH31                     | 0      | 3.6    | 3.6   | Lateritic cover    | Gradational |
| TH31                     | 3.6    | 17.9   | 14.3  | Garnet amphibolite | Gradational |
| TH31                     | 17.9   | 31.9   | 14    | SBIF               | Sharp       |
| TH31                     | 31.9   | 49.9   | 18    | Mafic granulite    | Sharp       |
| TH31                     | 49.9   | 62.88  | 12.98 | Garnet amphibolite | Sharp       |
| TH31                     | 62.88  | 81     | 18.12 | Mafic granulite    | EOH         |
| TD47                     | 0      | 25.4   | 25.4  | Lateritic cover    | Gradational |
| TD47                     | 25.4   | 55.9   | 30.5  | Garnet amphibolite | Gradational |
| TD47                     | 55.9   | 70.2   | 14.3  | SBIF               | Gradational |
| TD47                     | 70.2   | 82.9   | 12.7  | Garnet amphibolite | Gradational |
| TD47                     | 82.9   | 184.9  | 102   | SBIF               | Sharp       |
| TD47                     | 184.9  | 189.1  | 4.2   | Biotite gneiss     | Sharp       |
| TD47                     | 189.1  | 195.1  | 6     | Garnet amphibolite | Sharp       |
| TD47                     | 195.1  | 197    | 1.9   | Biotite gneiss     | Sharp       |
| TD47                     | 197    | 204.7  | 7.7   | Garnet amphibolite | Sharp       |
| TD47                     | 204.7  | 212.1  | 7.4   | Biotite gneiss     | Sharp       |
| TD47                     | 212.1  | 214.6  | 2.5   | Mafic granulite    | Sharp       |
| TD47                     | 214.6  | 242    | 27.4  | Biotite gneiss     | Gradational |
| TD47                     | 242    | 273    | 31    | SBIF               | Sharp       |
| TD47                     | 273    | 315.9  | 42.9  | Biotite gneiss     | Sharp       |
| TD47                     | 315.9  | 329    | 13.1  | Garnet amphibolite | EOH         |
| TD60                     | 0      | 12.6   | 12.6  | Lateritic cover    | Gradational |
| TD60                     | 12.6   | 16.9   | 4.3   | Biotite gneiss     | Sharp       |
| TD60                     | 16.9   | 40     | 23.1  | Mafic granulite    | Sharp       |
| TD60                     | 40     | 67     | 27    | Garnet amphibolite | Gradational |
| TD60                     | 67     | 72.2   | 5.2   | SBIF               | Sharp       |
| TD60                     | 72.2   | 79.3   | 7.1   | Garnet amphibolite | Sharp       |
| TD60                     | 79.3   | 84.4   | 5.1   | SBIF               | Gradational |
| TD60                     | 84.4   | 110    | 25.6  | Garnet amphibolite | EOH         |
| TD65                     | 0      | 1.3    | 1.3   | Lateritic cover    | Gradational |
| TD65                     | 1.3    | 8.7    | 7.4   | Hematite cap       | Gradational |
| TD65                     | 8.7    | 22.06  | 13.36 | Mafic granulite    | Gradational |
| TD65                     | 22.06  | 56.55  | 34.49 | SBIF               | Sharp       |
| TD65                     | 56.55  | 111    | 54.45 | Mafic granulite    | EOH         |
| <b>Southern prospect</b> |        |        |       |                    |             |
| TE6                      | 0      | 11     | 11    | Lateritic cover    | Gradational |
| TE6                      | 11     | 91.3   | 80.3  | Biotite gneiss     | Gradational |
| TE6                      | 91.3   | 95.9   | 4.6   | Mafic granulite    | Gradational |
| TE6                      | 95.9   | 125    | 29.1  | Biotite gneiss     | Sharp       |
| TE6                      | 125    | 153.8  | 28.8  | Garnet amphibolite | Sharp       |
| TE6                      | 153.8  | 192.8  | 39    | SBIF               | Sharp       |
| TE6                      | 192.8  | 218.3  | 25.5  | Mafic granulite    | Gradational |
| TE6                      | 218.3  | 246.9  | 28.6  | SBIF               | Gradational |
| TE6                      | 246.9  | 300    | 53.1  | Biotite gneiss     | EOH         |
| TE5                      | 0      | 6.56   | 6.56  | Lateritic cover    | Gradational |
| TE5                      | 6.56   | 88.93  | 82.37 | Biotite gneiss     | Gradational |
| TE5                      | 88.93  | 123.25 | 34.32 | SBIF               | Sharp       |
| TE5                      | 123.25 | 155    | 31.75 | Mafic granulite    | Sharp       |
| TE5                      | 155    | 168.4  | 13.4  | SBIF               | Sharp       |
| TE5                      | 168.4  | 182    | 13.6  | Biotite gneiss     | EOH         |
| TE4                      | 0      | 8.5    | 8.5   | Lateritic cover    | Gradational |
| TE4                      | 8.5    | 44.65  | 36.15 | Biotite gneiss     | Sharp       |
| TE4                      | 44.65  | 81.35  | 36.7  | SBIF               | Sharp       |
| TE4                      | 81.35  | 106.25 | 24.9  | Mafic granulite    | Sharp       |

|      |        |        |        |                    |             |
|------|--------|--------|--------|--------------------|-------------|
| TE4  | 106.25 | 115.55 | 9.3    | SBIF               | Sharp       |
| TE4  | 115.55 | 245    | 129.45 | Biotite gneiss     | EOH         |
| TE9  | 0      | 11.65  | 11.65  | Lateritic cover    | Gradational |
| TE9  | 11.65  | 80.7   | 69.05  | Biotite gneiss     | Gradational |
| TE9  | 80.7   | 93.7   | 13     | Garnet amphibolite | Gradational |
| TE9  | 93.7   | 119.5  | 25.8   | SBIF               | Gradational |
| TE9  | 119.5  | 134.75 | 15.25  | Garnet amphibolite | Gradational |
| TE9  | 134.75 | 141    | 6.25   | Mafic granulite    | Gradational |
| TE9  | 141    | 186.4  | 45.4   | SBIF               | Sharp       |
| TE9  | 186.4  | 220    | 33.6   | Biotite gneiss     | EOH         |
| TE22 | 0      | 19.4   | 19.4   | Lateritic cover    | Gradational |
| TE22 | 19.4   | 21.6   | 2.2    | SBIF               | Sharp       |
| TE22 | 21.6   | 33.4   | 11.8   | Mafic granulite    | Sharp       |
| TE22 | 33.4   | 37.3   | 3.9    | SBIF               | Sharp       |
| TE22 | 37.3   | 42     | 4.7    | Mafic granulite    | Sharp       |
| TE22 | 42     | 45.5   | 3.5    | SBIF               | Sharp       |
| TE22 | 45.5   | 46.5   | 1      | Mafic granulite    | Gradational |
| TE22 | 46.5   | 48     | 1.5    | BIF                | Gradational |
| TE22 | 48     | 50.5   | 2.5    | Mafic granulite    | Sharp       |
| TE22 | 50.5   | 133.5  | 83     | SBIF               | Sharp       |
| TE22 | 133.5  | 137.6  | 4.1    | Mafic granulite    | Sharp       |
| TE22 | 137.6  | 139    | 1.4    | Biotite gneiss     | EOH         |
